# Supplementary material for: Comparison of vaginal microbiota sampling techniques: cytobrush versus swab
Source: PubMed Central journal article supplement (PMC5575119; doi:10.1038/s41598-017-09844-4), 2017-08-29
Supplement: 41598_2017_9844_MOESM1_ESM.pdf [file 41598_2017_9844_MOESM1_ESM.pdf]

## **Supplementary information**

### **Comparison of vaginal microbiota sampling techniques: cytobrush versus swab**

Anita Mitra, David A MacIntyre, Vishakha Mahajan, Yun S Lee, Ann Smith, Julian R. Marchesi,  
Deirdre Lyons, Phillip R Bennett, Maria Kyrgiou.

**Supplementary Table 1. Patient characteristics**

| <b>Characteristics</b>                      | <b>n = 30</b>       |
|---------------------------------------------|---------------------|
| <b>Age, years</b> Mean (SD, range)          | 30.8 (4.9, 26 – 43) |
| <b>Ethnicity , n/N (%)</b>                  |                     |
| Caucasian                                   | 27/30 (90.0)        |
| Asian                                       | 3/30 (10.0)         |
| Black                                       | 0/30 (0)            |
| <b>Parity, n/N (%)</b>                      |                     |
| Nulliparous                                 | 20/30 (66.7)        |
| Parous                                      | 10/30 (33.3)        |
| <b>Smoking status, n/N (%)</b>              |                     |
| Current smoker                              | 5/30 (16.7)         |
| Non-smoker                                  | 25/30 (83.3)        |
| <b>Phase of menstrual cycle, n/N (%)</b>    |                     |
| Luteal                                      | 8/30 (26.7)         |
| Follicular                                  | 15/30 (50.0)        |
| Unknown                                     | 7/30 (23.3)         |
| <b>Contraception, n/N (%)</b>               |                     |
| Nil                                         | 13/30 (43.3)        |
| Condoms                                     | 5/30 (16.7)         |
| COCP                                        | 5/30 (16.7)         |
| POP                                         | 2/30 (6.7)          |
| Copper IUD                                  | 1/30 (3.2)          |
| Mirena IUS                                  | 2/30 (6.7)          |
| Contraceptive implant                       | 2/30 (6.7)          |
| <b>Time since last intercourse, n/N (%)</b> |                     |
| >48 hours                                   | 26/30 (86.7)        |
| <48 hours                                   | 4/30 (13.3)         |
| <b>Histological severity of lesion</b>      |                     |
| CIN2                                        | 20/30 (66.7)        |
| CIN3                                        | 10/30 (33.3)        |

*CIN: Cervical intraepithelial neoplasia; COCP: Combined oral contraceptive pill; IUD: Intrauterine device; IUS: Intrauterine system; POP: Progesterone-only pill*

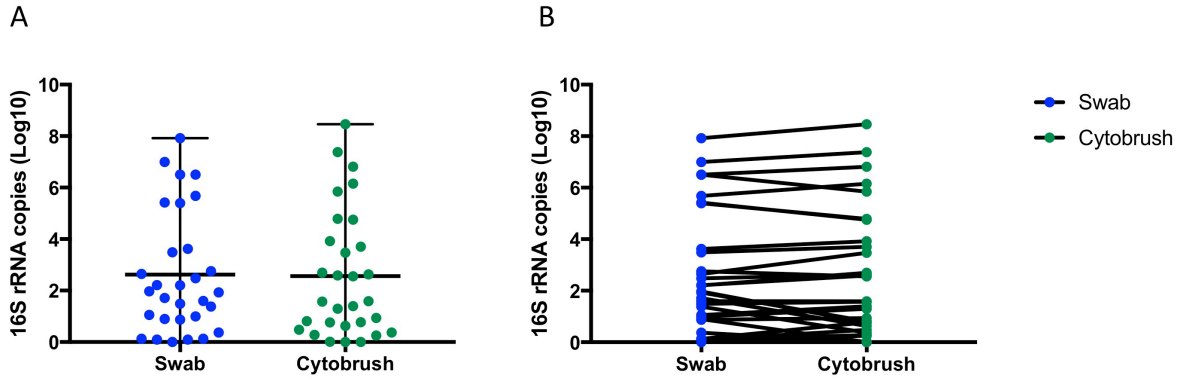

**Supplementary Figure 1. Comparison of Gardnerella vaginalis gene copies using qPCR**

There was no significant difference between the number of *G.vaginalis* gene copies present in paired swabs and cytobrush collected samples, normalised for total bacterial load (Figure 1) ( $p=0.6313$ ) (Paired t-test) (A). Where different the values were not consistently higher or lower with either technique (B).
